# Supplementary material
Source: PubMed Central journal article supplement (PMC3051420)
Supplement: NIHMS275006-supplement-Supplementary_data.pdf [file NIHMS275006-supplement-Supplementary_data.pdf]

## Supplementary Information

|  |  |
| --- | --- |
|  |  |

Figure S1 Typical load-displacement curves obtained from AFM force measurement on Site 0 and Site 7 as marked in Figure 5(b).

**
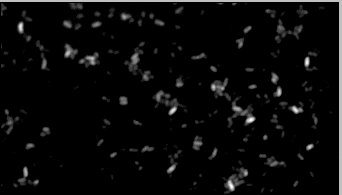
**

Figure S2 Microscopic image (using a 100X objective) of early 5 min-treated *E. coli* cells which were subject to 8-h incubation in LB, indicating no filamentation.
